# Supplementary material
Source: PubMed Central journal article supplement (PMC5747970)
Supplement: NIHMS929664-supplement-Data.pdf [file NIHMS929664-supplement-Data.pdf]

## Supplementary Online Content

Ahmed N, Brawley V, Hegde M, et al. HER2-specific chimeric antigen receptor–modified virus-specific T cells for progressive glioblastoma: a phase 1 dose-escalation trial. *JAMA Oncol*. Published online April 20, 2017.  
doi:10.1001/jamaoncol.2017.0184

### **eAppendix.** Materials and Methods

#### **eTable 1.** Patient Characteristics

#### **eTable 2.** Expression of HER2, CMV pp65, and CMV IE1 in GBMs of Study Patients

#### **eTable 3.** Patient Outcomes

#### **eTable 4.** Univariate Cox Proportional Hazards Regression Analysis

#### **eFigure 1.** Detection of HER2, CMV pp65, and CMV IE1 Expression by Immunohistochemistry in GBMs of Study Patients

#### **eFigure 2.** Characterization of HER2-CAR VST Product

#### **eFigure 3.** In vivo Persistence of HER2-CAR VSTs

#### **eFigure 4.** Precursor Frequency of CMV-, Adv-, and EBV-Specific T-cells Post HER2-CAR VST Infusion

#### **eReferences.**

This supplementary material has been provided by the authors to give readers additional information about their work.

## **eAppendix. Materials and Methods**

### **Generation of HER2-CAR VSTs**

Autologous HER2-CAR modified virus-specific T-cells (HER2-CAR VSTs) were manufactured from peripheral blood mononuclear cells (PBMCs) obtained from a blood draw according to current Good Manufacturing Practice (cGMP) guidelines as previously described.<sup>1,2</sup> PBMCs were transduced with a clinical grade adenoviral vector encoding the immunodominant CMV pp65 antigen (Ad5f35pp65) after an overnight adherence step.<sup>1,2</sup> Starting on day 10 post transduction, the cells were re-stimulated weekly with irradiated autologous EBV-transformed lymphoblastoid cell lines (LCLs) transduced with the same Ad5f35pp65 vector (Ad5f35pp65-LCL). Three to 4 days after the 2<sup>nd</sup> Ad5f35pp65-LCL stimulation T-cells were transduced with a clinical grade retroviral vector encoding a HER2-specific CAR, consisting of a murine scFv FRP5, a short hinge, a CD28 transmembrane domain, and a CD28.ζ signaling domain.<sup>3,4</sup> HER2-CAR VSTs were cryopreserved 7 to 10 days after the 4<sup>th</sup> stimulation.

### **Flow cytometry**

A FACSCalibur instrument (Becton Dickinson, San Jose, CA) and CellQuest software (Becton Dickinson) was used for flow cytometric analysis.<sup>4</sup> Monoclonal antibodies (MAbs) were obtained from Becton Dickinson and included anti-CD3, -CD4, -CD8, -CD16, -CD19, -CD56, -CD62L, -CCR7, -TCRαβ, and -TCR γ δ. HER2-CAR expression was detected with a murine scFV-specific MAb (Jackson ImmunoResearch Laboratories). Negative controls included isotype antibodies.

### **Real-time PCR assay**

We used a FRP5-specific primer and TaqMan probe (Applied Biosystems) to detect HER2-CAR T cells.<sup>4</sup> DNA was extracted with the QIAamp DNA Blood Mini Kit (Qiagen) and qPCR was performed in triplicates using the ABI RPISM 7900HT Sequence Detection System (Applied Biosystems). The baseline range was set at cycles 6-15, with the threshold at 10 SDs above the baseline fluorescence. To generate DNA standards, we established serial dilution of DNA plasmids encoding each specific cassette.

### **Enzyme-linked immunospot (Elispot) assay**

The frequency of antigen-specific T cells in the HER2–CAR VST product and peripheral blood of patients was measured using interferon- $\gamma$  (IFN- $\gamma$ ) Elispot assays as previously described.<sup>1,5</sup> Briefly, HER2-CAR VSTs or PBMCs were stimulated with overlapping peptide mixes for pp65, IE1, hexon, and penton. Peptide mixes contained 15 amino-acid peptides covering the entire length of the corresponding protein with an 11 amino-acid overlap (pepmixes; JPT Peptide Technologies, Berlin, Germany). Media (no peptide) served as negative control, and Phytohemagglutinin (PHA, Sigma) as positive control. Developed Elispots were analyzed by ZellNet Consulting (New York, NY). Spot-forming cells (SFCs) were calculated and expressed as SFC per  $10^5$  cells for T-cell products and  $2 \times 10^5$  cells for PBMCs.

### **Cytotoxicity assay**

Cytotoxic activity of HER2-CAR VSTs against targets was determined by standard  $^{51}\text{Cr}$  release assay.<sup>3</sup>  $1 \times 10^6$  target cells were labeled with  $50 \mu\text{Ci}$   $^{51}\text{Cr}$  and incubated for 1 hour. Targets were then washed and  $5 \times 10^3$  cells were co-cultured with effector T cells at different effector to target (E:T) ratios. Supernatants were analyzed with a Packard Cobra Quantum gamma counter Model E 5010 (Perkin Elmer, Shelton CT) reader after 4 hour incubation. Lysis was calculated as previously described.

### **Immunohistochemistry (IHC)**

Formalin-fixed, paraffin embedded sections ( $6 \mu\text{m}$ ) of GBM were processed as previously described,<sup>5-7</sup> and stained with a phospho-HER2 MAb (CB11, Abcam, Cambridge, MA) for HER2 detection. All slides were counterstained in Harris hematoxylin. Known HER2-expressing breast cancer samples were used as positive controls. Slides only stained with secondary MAb served as negative controls.

**eTable 1.** Patient Characteristics

| UPN | Age (years)<br>/sex | Dx  | Prior Treatment           |                |                                                                                            |                                                      | Time to<br>T-Cell Therapy<br>(months) |
|-----|---------------------|-----|---------------------------|----------------|--------------------------------------------------------------------------------------------|------------------------------------------------------|---------------------------------------|
|     |                     |     | Surgery                   | XRT+TMZ        | Salvage Therapies                                                                          | Investigational Agents                               |                                       |
| 01  | 42.8/F              | GBM | Yes, x3                   | Yes            | (1) TMZ + Hydrox<br>(2) TMZ<br>(3) CCNU + Bev<br>(4) TMZ + Hydrox + Bev<br>(5) Irino + Bev | (1) TMZ + Iniparib<br>(2) Carbo + Iniparib           | 27.2                                  |
| 02  | 59.3/M              | GBM | Yes, at dx                | Yes            | Bev                                                                                        | None                                                 | 12.4                                  |
| 03  | 29.6/M              | GBM | Yes, at dx                | Yes            | (1) BCNU<br>(2) Bev                                                                        | Veliparib                                            | 16.0                                  |
| 04  | 17.1/M              | GBM | Biopsy only               | Yes            | None                                                                                       | None                                                 | 7.3                                   |
| 05  | 62.2/M              | GBM | Yes, x2                   | Yes            | Irino + Bev                                                                                | None                                                 | 27.2                                  |
| 06  | 59.4/F              | GBM | Yes, x2                   | Yes            | TMZ + Accutane + Verapamil +<br>Metformin + Tamox                                          | (1) Toca 511 + Toca<br>(2) Bev + EGFRvIII<br>vaccine | 20.3                                  |
| 07  | 61.7/F              | GBM | Yes, at dx                | Yes            | Bev + Carbo                                                                                | Imatinib mesylate                                    | 13.3                                  |
| 08  | 10.6/M              | GBM | Yes, at dx                | XRT, No<br>TMZ | None                                                                                       | None                                                 | 7.3                                   |
| 09  | 63.5/M              | GBM | Yes, x2 (STR then<br>GTR) | Yes            | None                                                                                       | Veliparib                                            | 12.8                                  |
| 10  | 50/M                | GBM | Yes, at dx                | Yes            | Paclitaxel                                                                                 | None                                                 | 13.2                                  |
| 11  | 62.7/M              | GBM | Yes, at dx                | Yes            | None                                                                                       | None                                                 | 11.3                                  |
| 12  | 13.1/M              | GBM | Yes, x2                   | Yes            | Bev                                                                                        | None                                                 | 6.2                                   |
| 13  | 69.3/F              | GBM | Yes, at dx                | Yes            | None                                                                                       | None                                                 | 17.0                                  |

|    |        |     |             |                |                           |                        |      |
|----|--------|-----|-------------|----------------|---------------------------|------------------------|------|
| 14 | 14.4/M | GBM | Yes; STR x2 | XRT, no<br>TMZ | None                      | None                   | 16.7 |
| 15 | 14.4/F | GBM | Yes, x4     | XRT, no<br>TMZ | (1) Vori<br>(2) Dasatinib | 5-FU + IFN $\alpha$ 2b | 5.9  |
| 16 | 10/F   | GBM | Yes, x2     | Yes            | None                      | None                   | 9.2  |
| 17 | 16.2/F | GBM | Yes, at dx  | Yes            | TMZ + CCNU                | None                   | 12.9 |

GBM: Glioblastoma  
UPN: unique patient number  
Hydrox: Hydroxychloroquine  
BCNU: Carmustine  
Toca 511: Vocimagene amiretrorepevec

Dx: Diagnosis  
CCNU: Lomustine  
Tamox: Tamoxifen  
IFN: Interferon

XRT: radiation therapy  
Bev: Bevacizumab  
Carbo: Carboplatin  
STR: subtotal resection

TMZ: Temozolomide  
Irino: Irinotecan  
Vori: Vorinostat  
GTR: gross total resection

**eTable 2.** Expression of HER2, CMV pp65, and CMV IE1 in GBMs of Study Patients

| UPN | HER2      |       | CMV       |       |           |         |
|-----|-----------|-------|-----------|-------|-----------|---------|
|     | Intensity | Grade | pp65      |       | IE1       |         |
|     |           |       | Intensity | Grade | Intensity | Grade   |
| 1   | 2+        | 2     | -         | -     | -         | -       |
| 2   | 2+        | 1     | 0         | 0     | 1+        | Grade 1 |
| 3   | 1+        | 1     | NE        | NE    | NE        | NE      |
| 4   | 2+        | 4     | 0         | 0     | 0         | 0       |
| 5   | 3+        | 2     | 0         | 0     | 0         | 0       |
| 6   | 2+        | 2     | NE        | NE    | 0         | 0       |
| 7   | 2+        | 2     | 1+        | 1     | 1+        | 1       |
| 8   | 1+ to 2+  | 1     | 1+        | 1     | 1+        | 1       |
| 9   | 3+        | 2     | 0         | 0     | 1+        | 1       |
| 10  | 2+        | 2     | 0         | 0     | 1+        | 1       |
| 11  | 3+        | 2     | 0         | 0     | 0         | 0       |
| 12  | 2+        | 1     | 0         | 0     | 0         | 0       |
| 13  | 3+        | 1     | 2         | 2     | 0         | 0       |
| 14  | 2+        | 2-3   | 0         | 0     | 0         | 0       |
| 15  | 2+        | 1     | 1+        | 4     | 1+        | 4       |
| 16  | 2+        | 3     | 0         | 0     | 0         | 0       |
| 17  | 3+        | 2     | 1+        | 3     | 2+        | 4       |

\*Grade (cells positive): 1 = 1-25%, 2 = 26-50%, 3 = 51-75%, 4 = 76-100%

\*\*Intensity: 1+ to 3+ based on positivity of control slides

NE: not evaluable

**eTable 3. Patient Outcomes**

| UPN                                                                                           | Site of tumor at T-cell infusion; measurement                                                            | T-cell dose/m <sup>2</sup>                                                               | Disease Responses (6 weeks) | Time to Progression (months from first infusion) | Survival (in months)       |                | Outcome                     |
|-----------------------------------------------------------------------------------------------|----------------------------------------------------------------------------------------------------------|------------------------------------------------------------------------------------------|-----------------------------|--------------------------------------------------|----------------------------|----------------|-----------------------------|
|                                                                                               |                                                                                                          |                                                                                          |                             |                                                  | From first T-cell infusion | From diagnosis |                             |
| 01                                                                                            | Genu of the corpus callosum and left forceps minor; irregular shape >1 cm thick                          | 1 x 10 <sup>6</sup><br>3 x 10 <sup>6</sup><br>1 x 10 <sup>7</sup><br>3 x 10 <sup>7</sup> | SD                          | 4.4                                              | 27.8                       | 55.0           | DOD                         |
| 02                                                                                            | Right parietal lobe; irregular shape >1 cm thick                                                         | 1 x 10 <sup>6</sup>                                                                      | PD                          | 4.0                                              | 4.0                        | 16.4           | DOD                         |
| 03                                                                                            | Left temporal lobe; 3 cm                                                                                 | 1 x 10 <sup>6</sup>                                                                      | PD                          | 2.1                                              | 15.5                       | 31.5           | DOD                         |
| 04                                                                                            | Right thalamic lesion; 4 x 3 cm                                                                          | 1 x 10 <sup>6</sup> (x2)                                                                 | PR                          | 9.2                                              | 26.9                       | 34.2           | DOD                         |
| 05                                                                                            | Left frontal lobe; 4.7 x 3.8 cm                                                                          | 3 x 10 <sup>6</sup>                                                                      | PD                          | 3.6                                              | 3.7                        | 30.9           | DOD                         |
| 06                                                                                            | Left parietal lobe; 4.6 x 3.8 cm                                                                         | 3 x 10 <sup>6</sup>                                                                      | SD                          | 2.3                                              | 2.4                        | 22.7           | death from peritoneal bleed |
| 07                                                                                            | Corpus callosum; 2 x 0.7cm                                                                               | 3 x 10 <sup>6</sup>                                                                      | PD                          | 1.4                                              | 6.9                        | 20.3           | DOD                         |
| 08                                                                                            | Right fronto-parietal cortex; stellate >1 cm thick                                                       | 1 x 10 <sup>7</sup>                                                                      | SD                          | no progression                                   | 28.6                       | 35.9           | Alive                       |
| 09                                                                                            | Temporo-parietal; 1 cm rim enhancement >1 cm thick                                                       | 1 x 10 <sup>7</sup> (x6)                                                                 | SD                          | no progression                                   | 28.4                       | 41.2           | Alive                       |
| 10                                                                                            | Right parietal, right pulvinar region, right periventricular, anterior insular cortex (multifocal) >1 cm | 1 x 10 <sup>7</sup>                                                                      | PD                          | 0.8                                              | 10.9                       | 24.1           | DOD                         |
| 11                                                                                            | Rim enhancement; 1 cm thick                                                                              | 3 x 10 <sup>7</sup>                                                                      | SD                          | lost to follow up at 6 months                    | 7.9                        | 19.2           | DOD                         |
| 12                                                                                            | Rim enhancement; 1 cm thick                                                                              | 3 x 10 <sup>7</sup>                                                                      | PD                          | 1.1                                              | 2.7                        | 8.9            | DOD                         |
| 13                                                                                            | Frontal lobe rim enhancement; 1 cm thick                                                                 | 3 x 10 <sup>7</sup> (x 3)                                                                | SD                          | no progression                                   | 23.7                       | 40.7           | Alive                       |
| 14                                                                                            | Left temporal lobe; 3.2 x 1.5 cm                                                                         | 3 x 10 <sup>7</sup>                                                                      | PD                          | 1.2                                              | 6.1                        | 22.8           | DOD                         |
| 15                                                                                            | Bilateral frontal lobe butterfly lesion; 8.3 x 6.7 x 6.5 cm                                              | 1 x 10 <sup>8</sup> (x2)                                                                 | SD                          | 2.7                                              | 6.4                        | 12.3           | DOD                         |
| 16                                                                                            | Right temporal lobe lesion; 2.9x1.6cm                                                                    | 1 x 10 <sup>8</sup> (x 2)                                                                | PD                          | 1.3                                              | 7.8                        | 17.0           | DOD                         |
| 17                                                                                            | Left thalamus; 2.2 x 1.2 cm lesion                                                                       | 1 x 10 <sup>8</sup> (x 2)                                                                | PD                          | 3.5                                              | 11.3                       | 24.2           | DOD                         |
| PD: progressive disease<br>SD: stable disease<br>PR: partial response<br>DOD: died of disease |                                                                                                          |                                                                                          |                             |                                                  |                            |                |                             |

**eTable 4.** Univariate Cox Proportional Hazards Regression Analysis

| Variable                               | Progression free survival |         | Overall survival      |         |
|----------------------------------------|---------------------------|---------|-----------------------|---------|
|                                        | Hazard ratio (95% CI)     | P value | Hazard ratio (95% CI) | P value |
| Age at diagnosis                       |                           |         |                       |         |
| ≤18 years (n=7)                        | 1.519 (0.505-4.567)       | 0.457   | 1.252 (0.419-3.743)   | 0.688   |
| >18 years (n=10)                       | 1                         |         | 1                     |         |
| Sex                                    |                           |         |                       |         |
| Female (n=7)                           | 1.384 (0.457-4.189)       | 0.565   | 1.312 (0.437-3.941)   | 0.629   |
| Male (n=10)                            | 1                         |         | 1                     |         |
| Salvage therapy                        |                           |         |                       |         |
| No (n=7)                               | 1                         |         | 1                     |         |
| Yes (n=10)                             | 6.24 (1.291-30.161)       | 0.023   | 4.302 (1.16-15.958)   | 0.018   |
| Time to T-cell therapy from dx         |                           |         |                       |         |
| ≤14 months (n=11)                      | 1                         |         | 1                     |         |
| >14 months (n=6)                       | 1.171 (0.381-3.6)         | 0.783   | 1.27 (0.41-3.932)     | 0.678   |
| HER2 expression grade <sup>a</sup>     |                           |         |                       |         |
| <2 (n=6)                               | 1                         |         | 1                     |         |
| ≥2 (n=11)                              | 1.389 (0.426-4.532)       | 0.586   | 1.203 (0.367-3.944)   | 0.761   |
| HER2 expression intensity <sup>b</sup> |                           |         |                       |         |
| 3 (n=5)                                | 1                         |         | 1                     |         |
| <3 (n=12)                              | 4.203 (0.922-19.16)       | 0.064   | 2.788(0.615-12.635)   | 0.183   |
| Number of T-cell infusions             |                           |         |                       |         |
| Single (n=10)                          | 1.889 (0.605-5.894)       | 0.273   | 2.265 (0.723-7.092)   | 0.161   |
| Multiple (n=7)                         | 1                         |         | 1                     |         |
| T-cell dose level                      |                           |         |                       |         |
| 1 (n=4)                                | 1                         |         | 1                     |         |
| 2 (n=3)                                | 2.231 (0.439-11.33)       | 0.333   | 8.415 (1.237-57.25)   | 0.030   |
| 3 (n=3)                                | 0.307 (0.033-2.832)       | 0.298   | 0.237 (0.026-2.177)   | 0.203   |
| 4 (n=4)                                | 0.665 (0.121-3.655)       | 0.639   | 1.486 0.233-9.481)    | 0.675   |
| 5 (n=3)                                | 2.437 (0.465-12.776)      | 0.292   | 2.639 (0.461-15.111)  | 0.276   |
| T-cell phenotype                       |                           |         |                       |         |
| CD8+/CD4+ ratio (n=17)                 | 0.981 (0.948-1.015)       | 0.264   | 0.982 (0.951-1.014)   | 0.265   |
| CD3+/RO+ (n=17)                        | 1.073 (0.945-1.218)       | 0.278   | 1.045 (0.919-1.189)   | 0.502   |
| CD3+/RO+/-                             | 0.993 (0.95-1.038)        | 0.757   | 1.009 (0.962-1.058)   | 0.720   |



|                                  |                     |  |       |                     |  |       |
|----------------------------------|---------------------|--|-------|---------------------|--|-------|
| CD62L+ n=17)                     |                     |  |       |                     |  |       |
| CD3+/RO+/CCR7-<br>/CD62L- (n=17) | 1.011 (0.969-1.055) |  | 0.616 | 0.998 (0.954-1.043) |  | 0.922 |

<sup>a</sup>Grade (cells positive): 1 = 1-25%, 2 = 26-50%, 3 = 51-75%, 4 = 76-100%

<sup>b</sup>Intensity: 1+ to 3+ based on positivity of control slides

**eFigure 1.** Detection of HER2, CMV pp65, and CMV IE1 Expression by Immunohistochemistry in GBMs of Study Patients

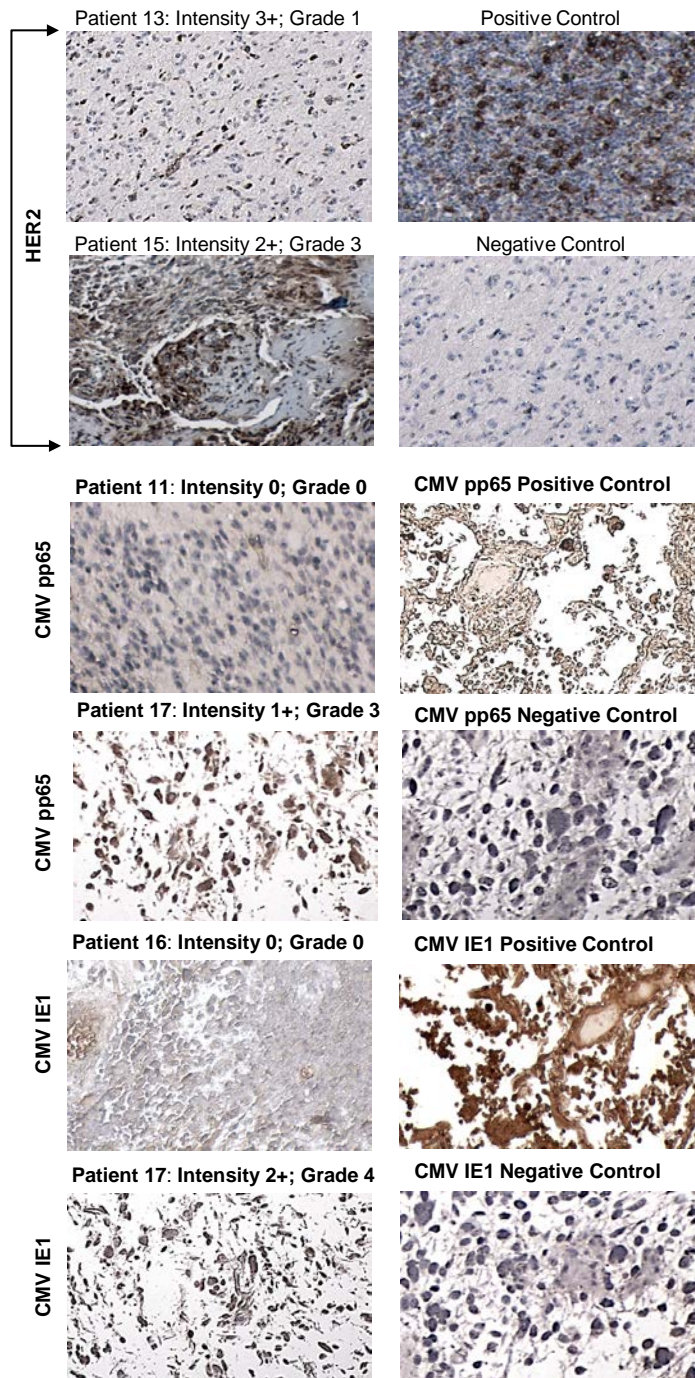

**Supplemental Figure 1**

Immunohistochemistry was used to detect HER2, CMV pp65, and CMV IE1 expression. Results were assessed according to the following scheme: Intensity: 0 to 3+ based on positivity of control slides; Grade (cells positive): 1 = 1-25%, 2 = 26-50%, 3 = 51-75%, 4 = 76-100%. Intensity: 1+ to 3+ based on positivity of control slides Representative images are shown (magnification 100-fold). Results for all patients are summarized in eTable 1.

**eFigure 2.** Characterization of HER2-CAR VST Product

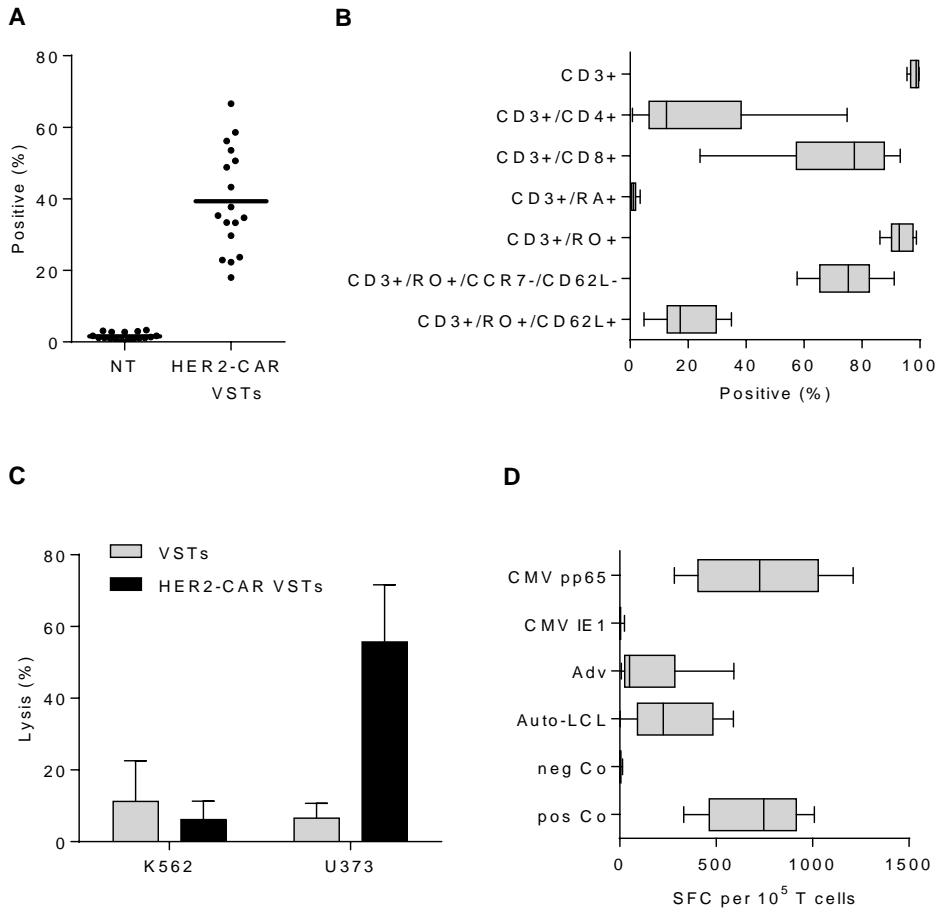

**Supplemental Figure 2**

(A) HER2-CAR expression on non-transduced (NT) and transduced T cells ( $p < 0.0001$ ). Individual data points and mean is shown. (B) Phenotypic analysis of HER2-CAR VST product. CM: central memory

(CD3+/CD45RO+/CD62L+); EM: effector memory (CD3+/CD45RO+/CCR7-/CD62L-). Box plot with whiskers (10 to 90 percentile) is shown. (C) Cytotoxicity assay using HER2-CAR VSTs and VSTs only as effectors and HER2-negative (K562) and HER2-positive (U373) cell lines as targets. Mean with standard deviation at an effector to target ratio of 20:1 is shown. HER2-CAR VSTs vs. VSTs only,  $p < 0.0001$ . (D) Virus-specificity HER2-CAR VST product was determined by IFN $\gamma$  Elispot assays using CMV pp65, CMV IE1, and hexon/penton (Adv) pepmixes, and auto-LCL as stimulators. PHA served as positive control (pos Co) and media as negative control (neg Co). Box plot with whiskers (10 to 90 percentile) is shown;  $p < 0.001$  for CMV pp65 vs neg Co, EBV vs neg Co;  $p = 0.005$  for Adv vs neg Co; NS for CMV IE1 vs neg Co.

**eFigure 3.** In vivo Persistence of HER2-CAR VSTs

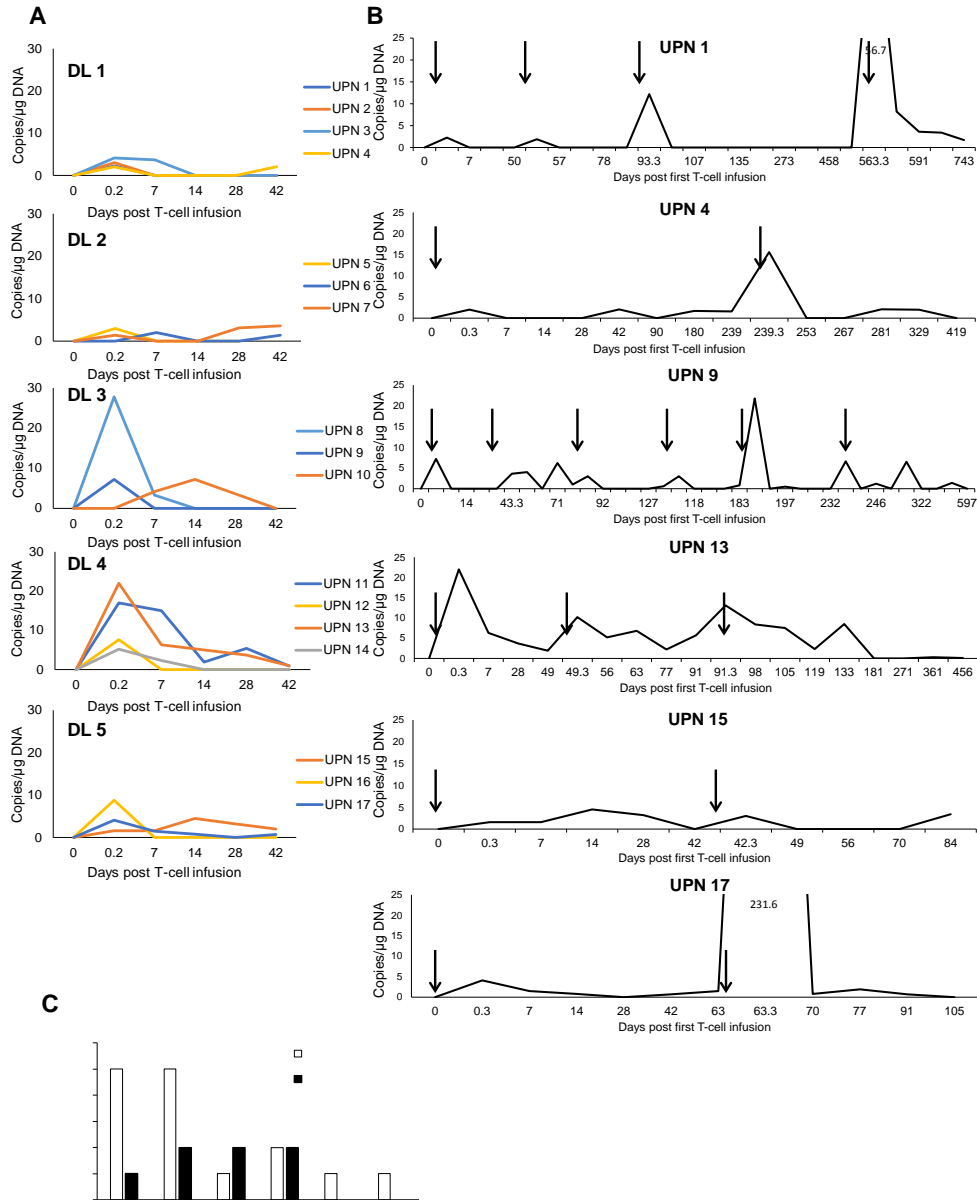

**Supplemental Figure 3**

In vivo persistence of HER2-CAR VSTs was detected by qPCR in the peripheral blood of patients. (A)

Persistence according to dose level (DL). (B) Persistence of HER2-CAR VSTs in the peripheral blood of

patients receiving  $\geq 2$  infusions. ↓ indicates infusion of HER2-CAR VSTs. (C) HER2-CAR VSTs were detected for up to 12 months post T-cell infusion. UPN=unique patient number.

**eFigure 4.** Precursor Frequency of CMV-, Adv-, and EBV-Specific T-cells Post HER2-CAR VST Infusion

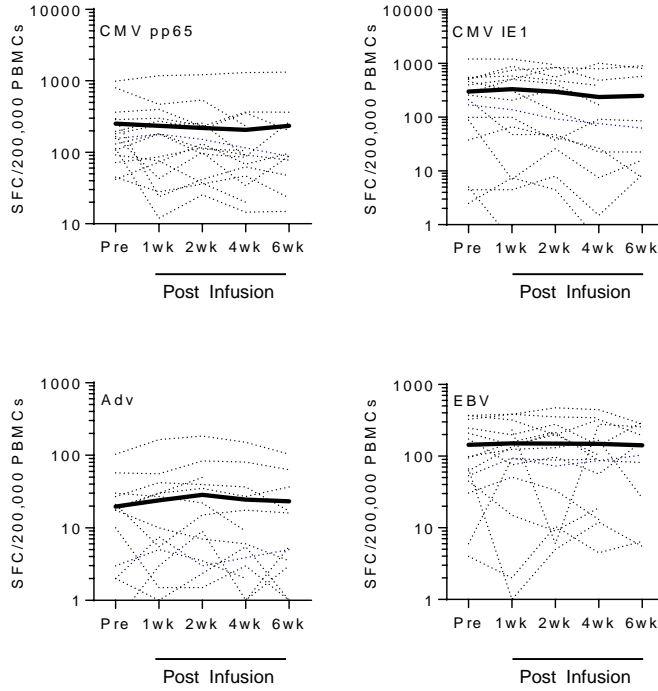

**Supplemental Figure 4**

Blood samples were obtained pre, and 1, 2, 4, and 6 week (wk) post T-cell infusion. The frequency of CMV pp65-, CMV IE1-, Adv-, and EBV-specific T cells was determined by IFN $\gamma$  Elispot assays using



pepmixes (CMV pp65, CMV IE1, Adv hexon/penton) or auto-LCL as stimulators. Individual patients (dotted lines) and mean (solid line) is shown. No significant differences were observed between individual time points.

## eReferences

1. Leen AM, Myers GD, Sili U, et al. Monoculture-derived T lymphocytes specific for multiple viruses expand and produce clinically relevant effects in immunocompromised individuals. *Nature medicine*. 10/2006 2006;12(10):1160-1166.
2. Leen AM, Myers GD, Sili U, et al. Monoculture-derived T lymphocytes specific for multiple viruses expand and produce clinically relevant effects in immunocompromised individuals. *Nature medicine*. Oct 2006;12(10):1160-1166.
3. Ahmed N, Salsman VS, Kew Y, et al. HER2-specific T cells target primary glioblastoma stem cells and induce regression of autologous experimental tumors. *Clin.Cancer Res*. 1/15/2010 2010;16(2):474-485.
4. Ahmed N, Brawley VS, Hegde M, et al. Human Epidermal Growth Factor Receptor 2 (HER2) - Specific Chimeric Antigen Receptor-Modified T Cells for the Immunotherapy of HER2-Positive Sarcoma. *Journal of clinical oncology : official journal of the American Society of Clinical Oncology*. May 20 2015;33(15):1688-1696.
5. Ghazi A, Ashoori A, Hanley PJ, et al. Generation of polyclonal CMV-specific T cells for the adoptive immunotherapy of glioblastoma. *J.Immunother*. 2/2012 2012;35(2):159-168.
6. Wakefield A, Pignata A, Ghazi A, et al. Is CMV a target in pediatric glioblastoma? Expression of CMV proteins, pp65 and IE1-72 and CMV nucleic acids in a cohort of pediatric glioblastoma patients. *Journal of neuro-oncology*. Sep 4 2015.
7. Ahmed N, Ratnayake M, Savoldo B, et al. Regression of experimental medulloblastoma following transfer of HER2-specific T cells. *Cancer Res*. 6/15/2007 2007;67(12):5957-5964.
